# Supplementary material for: Integrating deep learning and unbiased automated high-content screening to identify complex disease signatures in human fibroblasts
Source: bioRxiv or medRxiv preprint supplement (doi:10.1101/2020.11.13.380576), 2022-03-16
Supplement: Supplementary file [file media-1.pdf]

# **Supplementary Information:**

## **Deep learning and automated Cell Painting reveal Parkinson's disease-specific signatures in primary patient fibroblasts**

**Lauren Schiff<sup>1,3</sup>, Bianca Migliori<sup>2,3</sup>, Ye Chen<sup>1,3</sup>, Deidre Carter<sup>2,3</sup>, Caitlyn Bonilla<sup>1</sup>, Jenna Hall<sup>2</sup>, Minjie Fan<sup>1</sup>, Edmund Tam<sup>2</sup>, Sara Ahadi<sup>1</sup>, Brodie Fischbacher<sup>2</sup>, Anton Geraschenko<sup>1</sup>, Christopher J. Hunter<sup>2</sup>, Subhashini Venugopalan<sup>1</sup>, Sean DesMarteau<sup>2</sup>, Arunachalam Narayanaswamy<sup>1</sup>, Selwyn Jacob<sup>2</sup>, Zan Armstrong<sup>1</sup>, Peter Ferrarotto<sup>2</sup>, Brian Williams<sup>1</sup>, Geoff Buckley-Herd<sup>2</sup>, Jon Hazard<sup>1</sup>, Jordan Goldberg<sup>2</sup>, Marc Coram<sup>1</sup>, Reid Otto<sup>2</sup>, Edward A. Baltz<sup>1</sup>, Laura Andres-Martin<sup>2</sup>, Orion Pritchard<sup>1</sup>, Alyssa Duren-Lubanski<sup>2</sup>, Kathryn Reggio<sup>2</sup>, NYSCF Global Stem Cell Array Team<sup>2</sup>, Lauren Bauer<sup>2</sup>, Raeka S. Aiyar<sup>2</sup>, Elizabeth Schwarzbach<sup>2</sup>, Daniel Paull<sup>2</sup>, Scott A. Noggle<sup>2</sup>, Frederick J. Monsma, Jr.<sup>2</sup>, Marc Berndl<sup>1,4</sup>, Samuel J. Yang<sup>1,4</sup>, Bjarki Johannesson<sup>2,4</sup>**

---

<sup>1</sup>Google Research, Mountain View, California, USA. <sup>2</sup>The New York Stem Cell Foundation Research Institute, New York, New York, USA. <sup>3</sup>These authors contributed equally: Lauren Schiff, Bianca Migliori, Ye Chen, Deidre Carter. <sup>4</sup>These authors contributed equally: Marc Berndl, Samuel J. Yang, Bjarki Johannesson. e-mail: [marcberndl@google.com](mailto:marcberndl@google.com); [samuely@google.com](mailto:samuely@google.com); [bjohannesson@nyscf.org](mailto:bjohannesson@nyscf.org)

| Cell line ID | Donor ID | Cross-val fold | Pair ID | Disease state | Sex | Age | European ancestry | UPDRS score | Biopsy collection year | Biopsy location       | Thaw format | Thaw freeze date | Doubling time |
|--------------|----------|----------------|---------|---------------|-----|-----|-------------------|-------------|------------------------|-----------------------|-------------|------------------|---------------|
| 01           | 50121    | 1              | 0       | Healthy       | F   | 54  | 99%               |             | 2012                   | unspecified           | 6w          | 6/17/2019        | 3.32          |
| 02           | 51255    | 1              | 0       | LRRK2 PD      | F   | 56  | 92%               | 71          | 2017                   | left upper thigh      | 6w          | 6/17/2019        | 2.68          |
| 03           | 51260    | 2              | 1       | Healthy       | F   | 64  | 96%               |             | 2017                   | left upper leg        | 12w→6w      | 8/9/2019         | 2.70          |
| 04           | 51253    | 2              | 1       | Sporadic PD   | F   | 63  | 99%               | 23          | 2017                   | left upper arm        | 6w          | 7/30/2019        | 3.41          |
| 05           | 50114    | 4              | 2       | Healthy       | M   | 67  | 94%               |             | 2012                   | unspecified           | 6w          | 7/31/2019        | 2.77          |
| 06           | 50463    | 4              | 2       | Sporadic PD   | M   | 69  | 92%               | 34          | 2013                   | unspecified           | 6w          | 8/15/2019        | 3.39          |
| 07           | 50752    | 4              | 3       | Healthy       | F   | 58  | 90%               |             | 2013                   | left upper arm        | 12w→6w      | 8/22/2019        | 5.36          |
| 08           | 50437    | 4              | 3       | Sporadic PD   | F   | 59  | 90%               | 45          | 2013                   | left upper leg        | 6w          | 7/11/2019        | 3.80          |
| 09           | 50665    | 1              | 4       | Healthy       | F   | 71  | 91%               |             | 2013                   | right lower leg       | 12w→6w      | 7/30/2019        | 3.24          |
| 10           | 50373    | 1              | 4       | Sporadic PD   | F   | 69  | 100%              | 61          | 2012                   | right thigh           | 6w          | 7/5/2019         | 4.37          |
| 11           | 51218    | 3              | 5       | Healthy       | F   | 60  | 100%              |             | 2016                   | left upper arm        | 6w          | 7/11/2019        | 2.47          |
| 12           | 51193    | 3              | 5       | Sporadic PD   | F   | 60  | 91%               | 53          | 2015                   | left thigh            | 6w          | 7/22/2019        | 2.49          |
| 13           | 50594    | 4              | 6       | Healthy       | M   | 81  |                   |             | 2013                   | right lower cheek     | 6w          | 6/17/2019        | 3.11          |
| 14           | 51259    | 4              | 6       | Sporadic PD   | M   | 76  | 95%               | 29          | 2017                   | left arm              | 6w          | 9/3/2019         | 3.87          |
| 15           | 51005    | 4              | 7       | Healthy       | F   | 57  | 90%               |             | 2014                   | left upper arm        | 6w          | 7/5/2019         | 2.83          |
| 16           | 51149    | 4              | 7       | Sporadic PD   | F   | 57  | 97%               | 26          | 2015                   | left upper arm        | 6w          | 7/5/2019         | 2.50          |
| 17           | 50183    | 3              | 8       | Healthy       | M   | 62  | 98%               |             | 2012                   | chest                 | 6w          | 7/18/2019        | 6.19          |
| 18           | 50951    | 3              | 8       | Sporadic PD   | M   | 62  | 98%               | 20          | 2014                   | left upper arm        | 12w→6w      | 7/30/2019        | 3.30          |
| 19           | 51107    | 0              | 9       | Healthy       | M   | 59  | 97%               |             | 2014                   | upper arm             | 6w          | 7/11/2019        | 2.53          |
| 20           | 51099    | 0              | 9       | Sporadic PD   | M   | 61  | 100%              | 19          | 2014                   | upper left arm        | 12w→6w      | 7/22/2019        | 4.06          |
| 21           | 51183    | 1              | 10      | Healthy       | M   | 66  | 89%               |             | 2015                   | left arm              | 6w          | 9/9/2019         | 2.12          |
| 22           | 50480    | 1              | 10      | Sporadic PD   | M   | 66  | 99%               | 56          | 2013                   | left upper arm        | 6w          | 7/31/2019        | 4.55          |
| 23           | 50764    |                | 11      | Healthy       | F   | 56  | 89%               |             | 2013                   | left upper arm        | 6w          | 6/7/2019         | 2.71          |
| 24           | 51266    |                | 11      | GBA PD        | F   | 54  | 96%               | 30          | 2017                   | unspecified           | 6w          | 6/7/2019         | 2.28          |
| 25           | 50167    | 0              | 12      | Healthy       | M   | 62  | 98%               |             | 2012                   | unspecified           | 12w→6w      | 7/22/2019        | 4.64          |
| 26           | 51156    | 0              | 12      | Sporadic PD   | M   | 68  | 100%              | 20          | 2015                   | left upper arm        | 6w          | 8/13/2019        | 2.41          |
| 27           | 50956    |                | 13      | Healthy       | M   | 47  |                   |             | 2014                   | left upper arm        | 6w          | 6/11/2019        | 6.64          |
| 28           | 51249    |                | 13      | GBA PD        | M   | 46  | 92%               | 20          | 2016                   | right upper arm       | 6w          | 6/11/2019        | 2.44          |
| 29           | 50767    | 2              | 14      | Healthy       | F   | 71  | 88%               |             | 2013                   | left upper arm        | 6w          | 7/30/2019        | 2.71          |
| 30           | 50406    | 2              | 14      | Sporadic PD   | F   | 68  | 90%               | 24          | 2012                   | right upper arm       | 12w→6w      | 9/3/2019         | 5.24          |
| 31           | 51105    | 2              | 15      | Healthy       | M   | 59  |                   |             | 2014                   | upper arm             | 6w          | 6/19/2019        | 2.28          |
| 32           | 51142    | 2              | 15      | Sporadic PD   | M   | 59  | 90%               | 36          | 2015                   | right arm             | 12w→6w      | 7/5/2019         | 3.07          |
| 33           | 51140    | 0              | 15      | Healthy       | M   | 55  | 96%               |             | 2015                   | left upper arm        | 6w          | 6/13/2019        | 3.53          |
| 34           | 51256    | 0              | 16      | Sporadic PD   | M   | 54  | 94%               | 31          | 2017                   | left inner arm        | 6w          | 6/13/2019        | 6.57          |
| 35           | 50939    | 1              | 17      | Healthy       | M   | 64  | 91%               |             | 2014                   | left upper arm        | 6w          | 7/22/2019        | 4.36          |
| 36           | 50449    | 1              | 17      | Sporadic PD   | M   | 64  | 98%               | 44          | 2013                   | left upper arm        | 12w→6w      | 7/30/2019        | 3.41          |
| 37           | 50128    | 3              | 18      | Healthy       | M   | 57  | 97%               |             | 2012                   | unspecified           | 6w          | 7/11/2019        | 2.72          |
| 38           | 50392    | 3              | 18      | LRRK2 PD      | M   | 59  | 93%               | 20          | 2012                   | right thigh           | 6w          | 7/11/2019        | 3.58          |
| 39           | 51239    | 0              | 19      | Healthy       | M   | 64  | 99%               |             | 2016                   | left upper inner arm  | 6w          | 7/31/2019        | 2.25          |
| 40           | 51037    | 0              | 19      | Sporadic PD   | M   | 68  | 93%               | 34          | 2014                   | left upper arm        | 12w→6w      | 8/29/2019        | 4.29          |
| 41           | 50199    | 1              | 20      | Healthy       | M   | 81  | 99%               |             | 2012                   | right arm             | 6w          | 6/7/2019         | 3.03          |
| 42           | 50590    | 1              | 20      | Sporadic PD   | M   | 76  | 92%               | 27          | 2013                   | left upper arm        | 6w          | 8/13/2019        | 3.30          |
| 43           | 50112    | 0              | 21      | Healthy       | F   | 77  | 92%               |             | 2012                   | unspecified           | 12w→6w      | 7/5/2019         | 4.28          |
| 44           | 51126    | 0              | 21      | Sporadic PD   | F   | 74  | 99%               | 35          | 2015                   | unspecified           | 6w          | 6/7/2019         | 3.42          |
| 45           | 50192    | 2              | 22      | Healthy       | M   | 77  | 97%               |             | 2012                   | nose                  | 6w          | 6/25/2019        | 4.53          |
| 46           | 51261    | 2              | 22      | LRRK2 PD      | M   | 74  | 92%               | 29          | 2017                   | right upper arm       | 12w→6w      | 8/22/2019        | 2.78          |
| 47           | 51152    |                | 23      | Healthy       | F   | 74  | 100%              |             | 2015                   | left upper arm        | 12w→6w      | 6/19/2019        | 2.94          |
| 48*          | 10124*   |                | 23      | GBA PD*       | F   | 74  | 94%               |             | 2011                   | right arm             | 6w          | 6/13/2019        | 6.04          |
| 49           | 51030    | 2              | 24      | Healthy       | F   | 70  | 94%               |             | 2014                   | left arm              | 6w          | 7/18/2019        | 2.80          |
| 50           | 51220    | 2              | 24      | Sporadic PD   | F   | 69  | 98%               | 21          | 2016                   | left upper arm        | 6w          | 7/18/2019        | 3.22          |
| 51           | 51093    | 0              | 25      | Healthy       | F   | 73  | 99%               |             | 2015                   | left upper arm        | 12w→6w      | 7/11/2019        | 2.75          |
| 52           | 50864    | 0              | 25      | Sporadic PD   | F   | 78  | 98%               | 34          | 2013                   | left upper arm        | 6w          | 6/13/2019        | 3.48          |
| 53           | 51254    |                | 26      | Healthy       | M   | 68  | 92%               |             | 2017                   | unspecified           | 6w          | 7/5/2019         | 2.25          |
| 54           | 10198    |                | 26      | GBA PD        | M   | 66  | 98%               | 38          | 2012                   | right upper inner arm | 6w          | 7/5/2019         | 2.40          |
| 55           | 51148    | 4              | 27      | Healthy       | M   | 61  | 90%               |             | 2015                   | left upper arm        | 6w          | 8/13/2019        | 2.68          |
| 56           | 50640    | 4              | 27      | Sporadic PD   | M   | 66  | 93%               | 21          | 2013                   | upper arm             | 6w          | 8/13/2019        | 2.90          |
| 57*          | 50634*   | 4              | 28      | Healthy*      | F   | 72  | 92%               |             | 2013                   | left upper arm        | 6w          | 7/5/2019         | 2.61          |
| 58           | 51243    | 4              | 28      | Sporadic PD   | F   | 72  | 90%               | 47          | 2016                   | right thigh           | 12w→6w      | 8/22/2019        | 2.66          |
| 59           | 51194    | 3              | 29      | Healthy       | M   | 80  | 99%               |             | 2015                   | left arm              | 6w          | 6/11/2019        | 3.75          |
| 60           | 51268    | 3              | 29      | Sporadic PD   | M   | 79  | 92%               | 44          | 2017                   | unspecified           | 6w          | 6/11/2019        | 2.70          |
| 61           | 51123    | 1              | 30      | Healthy       | F   | 54  | 92%               |             | 2015                   | left upper arm        | 6w          | 6/25/2019        | 3.21          |
| 62           | 50483    | 1              | 30      | Sporadic PD   | F   | 55  | 91%               |             | 2013                   | left upper leg        | 6w          | 6/25/2019        | 4.79          |
| 63           | 51004    | 3              | 31      | Healthy       | M   | 54  | 98%               |             | 2014                   | left upper arm        | 12w→6w      | 6/25/2019        | 3.09          |
| 64           | 50963    | 3              | 31      | Sporadic PD   | M   | 54  | 99%               | 42          | 2014                   | left upper arm        | 6w          | 6/7/2019         | 3.67          |
| 65           | 10130    | 4              | 32      | Healthy       | M   | 52  |                   |             | 2011                   | left inner arm        | 6w          | 6/11/2019        | 2.52          |
| 66           | 50674    | 4              | 32      | LRRK2 PD      | M   | 51  | 91%               | 12          | 2013                   | right upper arm       | 6w          | 6/11/2019        | 4.23          |
| 67           | 50598    | 2              | 33      | Healthy       | M   | 58  | 91%               |             | 2013                   | left forearm          | 6w          | 7/30/2019        | 2.57          |
| 68           | 50610    | 2              | 33      | Sporadic PD   | M   | 59  | 97%               | 28          | 2013                   | left upper arm        | 6w          | 6/25/2019        | 2.88          |
| 69           | 51162    | 1              | 34      | Healthy       | M   | 47  | 98%               |             | 2015                   | left arm              | 6w          | 8/13/2019        | 2.01          |
| 70           | 50592    | 1              | 34      | LRRK2 PD      | M   | 45  | 91%               |             | 2013                   | left upper arm        | 12w→6w      | 8/22/2019        | 2.90          |
| 71           | 51235    | 0              | 35      | Healthy       | M   | 68  | 98%               |             | 2016                   | left arm              | 6w          | 9/9/2019         | 2.48          |
| 72           | 51212    | 0              | 35      | Sporadic PD   | M   | 70  | 98%               | 28          | 2013                   | left arm              | 6w          | 8/15/2019        | 3.08          |
| 73           | 50191    |                | 36      | Healthy       | M   | 61  | 92%               |             | 2012                   | right cheek           | 6w          | 7/22/2019        | 6.10          |
| 74           | 50660    |                | 36      | GBA PD        | M   | 65  | 91%               |             | 2013                   | left upper arm        | 12w→6w      | 7/30/2019        | 5.78          |
| 75           | 50105    |                | 37      | Healthy       | M   | 76  | 90%               |             | 2012                   | unspecified           | 12w→6w      | 7/22/2019        | 4.07          |
| 76           | 51221    |                | 37      | GBA PD        | M   | 74  | 93%               | 22          | 2016                   | left upper arm        | 6w          | 6/25/2019        | 2.63          |
| 77           | 51274    |                | 38      | Healthy       | M   | 64  |                   |             | 2018                   | left upper arm        | 6w          | 8/13/2019        | 2.82          |
| 78           | 51021    |                | 38      | GBA PD        | M   | 65  | 93%               |             | 2014                   | left upper arm        | 6w          | 8/13/2019        | 2.86          |
| 79           | 50176    |                | 39      | Healthy       | M   | 58  |                   |             | 2012                   | chin                  | 6w          | 6/19/2019        | 3.16          |
| 80           | 50880    |                | 39      | GBA PD        | M   | 59  | 93%               | 18          | 2013                   | upper arm             | 6w          | 6/19/2019        | 3.50          |
| 81           | 50559    | 0              | 40      | Healthy       | F   | 64  | 91%               |             | 2013                   | left upper arm        | 6w          | 7/31/2019        | 2.58          |
| 82           | 51010    | 0              | 40      | LRRK2 PD      | F   | 63  | 94%               | 18          | 2013                   | left upper arm        | 12w→6w      | 8/28/2019        | 3.91          |
| 83           | 50617    | 4              | 41      | Healthy       | M   | 53  |                   |             | 2013                   | right upper leg       | 6w          | 6/13/2019        | 2.79          |
| 84           | 51176    | 4              | 41      | Sporadic PD   | M   | 53  | 98%               | 31          | 2015                   | left arm              | 6w          | 6/13/2019        | 2.71          |
| 85           | 51139    | 3              | 42      | Healthy       | F   | 52  | 99%               |             | 2015                   | left upper arm        | 6w          | 8/15/2019        | 2.38          |
| 86           | 51187    | 3              | 42      | Sporadic PD   | F   | 66  | 98%               | 16          | 2015                   | left upper arm        | 6w          | 8/29/2019        | 2.52          |
| 87           | 50758    | 3              | 43      | Healthy       | F   | 78  | 91%               |             | 2013                   | left upper arm        | 6w          | 6/13/2019        | 4.02          |
| 88           | 51200    | 3              | 43      | Sporadic PD   | F   | 80  | 90%               | 79          | 2015                   | left arm              | 6w          | 6/11/2019        | 4.54          |
| 89           | 50174    | 2              | 44      | Healthy       | M   | 56  | 96%               |             | 2012                   | forehead              | 6w          | 6/17/2019        | 2.55          |
| 90           | 50421    | 2              | 44      | Sporadic PD   | M   | 55  | 99%               | 26          | 2012                   | left upper arm        | 6w          | 6/17/2019        | 4.98          |
| 91           | 50497    |                |         | Sporadic PD   | F   | 64  | 90%               | 45          | 2018                   | left upper arm        | 6w          | 7/11/2019        | 2.53          |
| 92           | 51239    |                |         | Healthy       | M   | 67  | 99%               |             | 2019                   | right arm             | 6w          | 7/31/2019        | 2.33          |
| 93           | 51083    |                |         | Healthy       | F   | 77  | 95%               |             | 2019                   | left arm              | 6w          | 6/19/2019        | 3.08          |
| 94           | 51148    |                |         | Healthy       | M   | 65  | 90%               |             | 2019                   | upper arm             | 6w          | 8/13/2019        | 2.21          |
| 95           | 50492    |                |         | LRRK2 PD      | M   | 51  | 91%               |             | 2019                   | left upper arm        | 6w          | 7/18/2019        | 3.55          |
| 96           | 50626    |                |         | Sporadic PD   | M   | 70  | 97%               | 43          | 2013                   | unspecified           | 6w          | 9/3/2019         | 2.60          |

**Supplementary Table 1 | Information about the 96 cell lines from 91 donors used in the study.** Columns left to right: a 2-digit ID mapping to a cell line from a unique skin biopsy; the biopsy donor; the cross-validation fold for healthy vs. PD prediction; ID for PD individual and matched healthy control; PD status; donor sex; donor age; an ancestry score from genotyping; the Unified Parkinson Disease Rating Scale, a clinical measure of PD severity; skin biopsy collection year; location where biopsy was acquired; cell expansion in 6-well ("6w") or from 12-well to 6-well format ("12w→6w"); date expanded cells were frozen; and doubling time during cell expansion in days, respectively. \*: unconfirmed cell line (see Methods).

|       |              |            | Cross-validation |        |        |        |        |        |        |        |
|-------|--------------|------------|------------------|--------|--------|--------|--------|--------|--------|--------|
|       |              |            | set #1           | set #2 | set #3 | set #4 | set #5 | set #6 | set #7 | set #8 |
| Batch | Plate layout | Cell lines |                  |        |        |        |        |        |        |        |
| 1     | 1            | all 96     | test             | ignore | ignore | ignore | ignore | train  | train  | train  |
|       | 2            | all 96     | ignore           | train  | train  | train  | test   | ignore | ignore | ignore |
| 2     | 1            | all 96     | ignore           | test   | ignore | ignore | train  | ignore | train  | train  |
|       | 2            | all 96     | train            | ignore | train  | train  | ignore | test   | ignore | ignore |
| 3     | 1            | all 96     | ignore           | ignore | test   | ignore | train  | train  | ignore | train  |
|       | 2            | all 96     | train            | train  | ignore | train  | ignore | ignore | test   | ignore |
| 4     | 1            | all 96     | ignore           | ignore | ignore | test   | train  | train  | train  | ignore |
|       | 2            | all 96     | train            | train  | train  | ignore | ignore | ignore | ignore | test   |

**Supplementary Table 2 | Cross-validation strategy for 96-way cell line classification.** For each of 8 cross-validation sets, both batch and plate layout were held out in the test set.

|       |              |                     | Cross-validation |        |        |        |        |        |        |        |
|-------|--------------|---------------------|------------------|--------|--------|--------|--------|--------|--------|--------|
|       |              |                     | set #1           | set #2 | set #3 | set #4 | set #5 | set #6 | set #7 | set #8 |
| Batch | Plate layout | Cell lines          |                  |        |        |        |        |        |        |        |
| 1     | 1            | 5 held-out biopsies | test             | ignore | ignore | ignore | ignore | ignore | ignore | ignore |
|       |              | remaining 91 lines  | ignore           | ignore | ignore | ignore | ignore | train  | train  | train  |
|       | 2            | 5 held-out biopsies | ignore           | ignore | ignore | ignore | test   | ignore | ignore | ignore |
|       |              | remaining 91 lines  | ignore           | train  | train  | train  | ignore | ignore | ignore | ignore |
| 2     | 1            | 5 held-out biopsies | ignore           | test   | ignore | ignore | ignore | ignore | ignore | ignore |
|       |              | remaining 91 lines  | ignore           | ignore | ignore | ignore | train  | ignore | train  | train  |
|       | 2            | 5 held-out biopsies | ignore           | ignore | ignore | ignore | ignore | test   | ignore | ignore |
|       |              | remaining 91 lines  | train            | ignore | train  | train  | ignore | ignore | ignore | ignore |
| 3     | 1            | 5 held-out biopsies | ignore           | ignore | test   | ignore | ignore | ignore | ignore | ignore |
|       |              | remaining 91 lines  | ignore           | ignore | ignore | ignore | train  | train  | ignore | train  |
|       | 2            | 5 held-out biopsies | ignore           | ignore | ignore | ignore | ignore | ignore | test   | ignore |
|       |              | remaining 91 lines  | train            | train  | ignore | train  | ignore | ignore | ignore | ignore |
| 4     | 1            | 5 held-out biopsies | ignore           | ignore | ignore | test   | ignore | ignore | ignore | ignore |
|       |              | remaining 91 lines  | ignore           | ignore | ignore | ignore | train  | train  | train  | ignore |
|       | 2            | 5 held-out biopsies | ignore           | ignore | ignore | ignore | ignore | ignore | ignore | test   |
|       |              | remaining 91 lines  | train            | train  | train  | ignore | ignore | ignore | ignore | ignore |

**Supplementary Table 3 | Cross-validation strategy for 91-way biopsy donor classification.** For each of 8 cross-validation sets, the test set consisted of cell lines from one of the two biopsies from the 5 individuals who donated two biopsies, while the train set consisted of cell lines from the complementary set of biopsies from these 5 individuals and the remaining 86 individuals who donated only a single biopsy. To avoid plate position biases as potential confounds, plate layout was also held out, and to assess model generalization to a test biopsy acquired in a new batch, batch was also held out. These 8 cross-validation sets were conducted twice, once holding out in the test sets the earlier set of skin biopsies from the 5 individuals who donated two biopsies (cell lines 08, 39, 51, 55, 70), and again holding out the later set (cell lines 91, 92, 93, 94, 95).

|           |               |         |       |              | Cross-validation |        |        |        |        |
|-----------|---------------|---------|-------|--------------|------------------|--------|--------|--------|--------|
| Cell line | Disease state | Pair ID | Batch | Plate layout | set #0           | set #1 | set #2 | set #3 | set #4 |
| 25        | Healthy       | 12      | all 4 | both         | test             | train  | train  | train  | train  |
| 26        | Sporadic PD   | 12      | all 4 | both         | test             | train  | train  | train  | train  |
| 33        | Healthy       | 16      | all 4 | both         | test             | train  | train  | train  | train  |
| 34        | Sporadic PD   | 16      | all 4 | both         | test             | train  | train  | train  | train  |
| 39        | Healthy       | 19      | all 4 | both         | test             | train  | train  | train  | train  |
| 40        | Sporadic PD   | 19      | all 4 | both         | test             | train  | train  | train  | train  |
| 43        | Healthy       | 21      | all 4 | both         | test             | train  | train  | train  | train  |
| 44        | Sporadic PD   | 21      | all 4 | both         | test             | train  | train  | train  | train  |
| 51        | Healthy       | 25      | all 4 | both         | test             | train  | train  | train  | train  |
| 52        | Sporadic PD   | 25      | all 4 | both         | test             | train  | train  | train  | train  |
| 71        | Healthy       | 35      | all 4 | both         | test             | train  | train  | train  | train  |
| 72        | Sporadic PD   | 35      | all 4 | both         | test             | train  | train  | train  | train  |
| 81        | Healthy       | 40      | all 4 | both         | test             | train  | train  | train  | train  |
| 82        | LRRK2 PD      | 40      | all 4 | both         | test             | train  | train  | train  | train  |
| 19        | Healthy       | 9       | all 4 | both         | test             | train  | train  | train  | train  |
| 20        | Sporadic PD   | 9       | all 4 | both         | test             | train  | train  | train  | train  |
| 1         | Healthy       | 0       | all 4 | both         | train            | test   | train  | train  | train  |
| 2         | LRRK2 PD      | 0       | all 4 | both         | train            | test   | train  | train  | train  |
| 21        | Healthy       | 10      | all 4 | both         | train            | test   | train  | train  | train  |
| 22        | Sporadic PD   | 10      | all 4 | both         | train            | test   | train  | train  | train  |
| 35        | Healthy       | 17      | all 4 | both         | train            | test   | train  | train  | train  |
| 36        | Sporadic PD   | 17      | all 4 | both         | train            | test   | train  | train  | train  |
| 41        | Healthy       | 20      | all 4 | both         | train            | test   | train  | train  | train  |
| 42        | Sporadic PD   | 20      | all 4 | both         | train            | test   | train  | train  | train  |
| 61        | Healthy       | 30      | all 4 | both         | train            | test   | train  | train  | train  |
| 62        | Sporadic PD   | 30      | all 4 | both         | train            | test   | train  | train  | train  |
| 69        | Healthy       | 34      | all 4 | both         | train            | test   | train  | train  | train  |
| 70        | LRRK2 PD      | 34      | all 4 | both         | train            | test   | train  | train  | train  |
| 9         | Healthy       | 4       | all 4 | both         | train            | test   | train  | train  | train  |
| 10        | Sporadic PD   | 4       | all 4 | both         | train            | test   | train  | train  | train  |
| 3         | Healthy       | 1       | all 4 | both         | train            | train  | test   | train  | train  |
| 4         | Sporadic PD   | 1       | all 4 | both         | train            | train  | test   | train  | train  |
| 29        | Healthy       | 14      | all 4 | both         | train            | train  | test   | train  | train  |
| 30        | Sporadic PD   | 14      | all 4 | both         | train            | train  | test   | train  | train  |
| 31        | Healthy       | 15      | all 4 | both         | train            | train  | test   | train  | train  |
| 32        | Sporadic PD   | 15      | all 4 | both         | train            | train  | test   | train  | train  |
| 45        | Healthy       | 22      | all 4 | both         | train            | train  | test   | train  | train  |
| 46        | LRRK2 PD      | 22      | all 4 | both         | train            | train  | test   | train  | train  |
| 49        | Healthy       | 24      | all 4 | both         | train            | train  | test   | train  | train  |
| 50        | Sporadic PD   | 24      | all 4 | both         | train            | train  | test   | train  | train  |
| 67        | Healthy       | 33      | all 4 | both         | train            | train  | test   | train  | train  |
| 68        | Sporadic PD   | 33      | all 4 | both         | train            | train  | test   | train  | train  |
| 89        | Healthy       | 44      | all 4 | both         | train            | train  | test   | train  | train  |
| 90        | Sporadic PD   | 44      | all 4 | both         | train            | train  | test   | train  | train  |
| 37        | Healthy       | 18      | all 4 | both         | train            | train  | train  | test   | train  |
| 38        | LRRK2 PD      | 18      | all 4 | both         | train            | train  | train  | test   | train  |
| 59        | Healthy       | 29      | all 4 | both         | train            | train  | train  | test   | train  |
| 60        | Sporadic PD   | 29      | all 4 | both         | train            | train  | train  | test   | train  |
| 63        | Healthy       | 31      | all 4 | both         | train            | train  | train  | test   | train  |
| 64        | Sporadic PD   | 31      | all 4 | both         | train            | train  | train  | test   | train  |
| 85        | Healthy       | 42      | all 4 | both         | train            | train  | train  | test   | train  |
| 86        | Sporadic PD   | 42      | all 4 | both         | train            | train  | train  | test   | train  |
| 87        | Healthy       | 43      | all 4 | both         | train            | train  | train  | test   | train  |
| 88        | Sporadic PD   | 43      | all 4 | both         | train            | train  | train  | test   | train  |
| 11        | Healthy       | 5       | all 4 | both         | train            | train  | train  | test   | train  |
| 12        | Sporadic PD   | 5       | all 4 | both         | train            | train  | train  | test   | train  |
| 17        | Healthy       | 8       | all 4 | both         | train            | train  | train  | test   | train  |
| 18        | Sporadic PD   | 8       | all 4 | both         | train            | train  | train  | test   | train  |
| 5         | Healthy       | 2       | all 4 | both         | train            | train  | train  | train  | test   |
| 6         | Sporadic PD   | 2       | all 4 | both         | train            | train  | train  | train  | test   |
| 55        | Healthy       | 27      | all 4 | both         | train            | train  | train  | train  | test   |
| 56        | Sporadic PD   | 27      | all 4 | both         | train            | train  | train  | train  | test   |
| 57*       | Healthy*      | 28      | all 4 | both         | train            | train  | train  | train  | test   |
| 58        | Sporadic PD   | 28      | all 4 | both         | train            | train  | train  | train  | test   |
| 7         | Healthy       | 3       | all 4 | both         | train            | train  | train  | train  | test   |
| 8         | Sporadic PD   | 3       | all 4 | both         | train            | train  | train  | train  | test   |
| 65        | Healthy       | 32      | all 4 | both         | train            | train  | train  | train  | test   |
| 66        | LRRK2 PD      | 32      | all 4 | both         | train            | train  | train  | train  | test   |
| 83        | Healthy       | 41      | all 4 | both         | train            | train  | train  | train  | test   |
| 84        | Sporadic PD   | 41      | all 4 | both         | train            | train  | train  | train  | test   |
| 13        | Healthy       | 6       | all 4 | both         | train            | train  | train  | train  | test   |
| 14        | Sporadic PD   | 6       | all 4 | both         | train            | train  | train  | train  | test   |
| 15        | Healthy       | 7       | all 4 | both         | train            | train  | train  | train  | test   |
| 16        | Sporadic PD   | 7       | all 4 | both         | train            | train  | train  | train  | test   |

**Supplementary Table 4 | 5-fold Cross-validation strategy for healthy vs. PD classification.** A subset of 74 cell lines from 74 individuals (6 *LRRK2* PD and paired controls, and 31 sporadic PD and paired controls) was divided into 5 cross-validation folds. For each of 5 cross-validation sets, one fold of cell lines was held out in the test set. \*: unconfirmed cell line (see Methods).

|                                                                                                                                                                                                                                                                                                                                                                                                                                                                                                                                                    |                                                                                                                                      |                                                                                                                  |
|----------------------------------------------------------------------------------------------------------------------------------------------------------------------------------------------------------------------------------------------------------------------------------------------------------------------------------------------------------------------------------------------------------------------------------------------------------------------------------------------------------------------------------------------------|--------------------------------------------------------------------------------------------------------------------------------------|------------------------------------------------------------------------------------------------------------------|
| cells_AreaShape_Compactness<br>cells_AreaShape_Eccentricity<br>cytoplasm_AreaShape_Compactness<br>cytoplasm_AreaShape_Eccentricity                                                                                                                                                                                                                                                                                                                                                                                                                 | cytoplasm_AreaShape_Solidity<br>cytoplasm_AreaShape_Extent<br>cells_AreaShape_Solidity                                               | nuclei_Granularity_11_ER<br>nuclei_Granularity_8_ER<br>nuclei_Granularity_7_ER                                   |
| cells_AreaShape_Zernike_8_4                                                                                                                                                                                                                                                                                                                                                                                                                                                                                                                        | cytoplasm_AreaShape_Zernike_6_4<br>cytoplasm_AreaShape_Zernike_8_8<br>cells_AreaShape_Zernike_6_6<br>cytoplasm_AreaShape_Zernike_6_6 | nuclei_Granularity_13_Mito                                                                                       |
| cells_Correlation_K_ER_RNA<br>cytoplasm_Correlation_K_ER_RNA<br>cytoplasm_Correlation_K_ER_DNA                                                                                                                                                                                                                                                                                                                                                                                                                                                     | cytoplasm_Correlation_Correlation_Mito_ER<br>cells_Correlation_Correlation_Mito_ER                                                   | nuclei_Granularity_14_DNA                                                                                        |
| cells_Correlation_Overlap_DNA_ER                                                                                                                                                                                                                                                                                                                                                                                                                                                                                                                   | cytoplasm_Correlation_Manders_AGP_DNA<br>cytoplasm_Correlation_Manders_RNA_DNA<br>cytoplasm_Correlation_Manders_Mito_DNA             | nuclei_Granularity_2_Mito                                                                                        |
| cells_Correlation_Overlap_ER_RNA                                                                                                                                                                                                                                                                                                                                                                                                                                                                                                                   | cytoplasm_Correlation_RWC_DNA_AGP                                                                                                    | nuclei_Granularity_4_Mito                                                                                        |
| cells_Correlation_Overlap_Mito_ER<br>cytoplasm_Correlation_Overlap_Mito_ER                                                                                                                                                                                                                                                                                                                                                                                                                                                                         | cytoplasm_Granularity_10_RNA                                                                                                         | nuclei_Granularity_6_ER                                                                                          |
| cells_Correlation_RWC_RNA_Mito                                                                                                                                                                                                                                                                                                                                                                                                                                                                                                                     | cytoplasm_Granularity_1_AGP<br>cells_Granularity_1_AGP                                                                               | nuclei_Granularity_8_Mito                                                                                        |
| cells_Granularity_6_AGP<br>cells_Granularity_7_AGP                                                                                                                                                                                                                                                                                                                                                                                                                                                                                                 | cytoplasm_RadialDistribution_MeanFrac_AGP_1of4<br>cytoplasm_RadialDistribution_MeanFrac_AGP_3of4                                     | nuclei_Intensity_IntegratedIntensityEdge_ER<br>nuclei_Texture_Contrast_ER_10_02                                  |
| cells_Intensity_IntegratedIntensity_Mito<br>cytoplasm_Intensity_MassDisplacement_AGP<br>cytoplasm_AreaShape_Area<br>cytoplasm_Intensity_IntegratedIntensity_RNA<br>cells_AreaShape_MeanRadius<br>cells_AreaShape_MaximumRadius<br>cytoplasm_Intensity_IntegratedIntensityEdge_Mito<br>cells_Intensity_IntegratedIntensityEdge_Mito<br>cytoplasm_Intensity_IntegratedIntensity_Mito<br>cells_AreaShape_Area<br>cytoplasm_Intensity_IntegratedIntensity_DNA<br>cells_Intensity_IntegratedIntensity_RNA<br>cytoplasm_Intensity_IntegratedIntensity_ER | cytoplasm_RadialDistribution_MeanFrac_RNA_3of4<br>cells_Granularity_15_RNA                                                           | nuclei_Intensity_IntegratedIntensity_RNA<br>nuclei_Intensity_IntegratedIntensity_ER                              |
| cells_Intensity_MassDisplacement_DNA                                                                                                                                                                                                                                                                                                                                                                                                                                                                                                               | cytoplasm_RadialDistribution_RadialCV_AGP_3of4<br>cytoplasm_RadialDistribution_RadialCV_RNA_2of4                                     | nuclei_Neighbors_NumberOfNeighbors_1                                                                             |
| cells_Neighbors_PercentTouching_5<br>cells_Neighbors_PercentTouching_Adjacent<br>cells_Neighbors_NumberOfNeighbors_5<br>cells_Neighbors_NumberOfNeighbors_Adjacent                                                                                                                                                                                                                                                                                                                                                                                 | nuclei_AreaShape_Zernike_2_0                                                                                                         | nuclei_Neighbors_SecondClosestDistance_1                                                                         |
| cells_RadialDistribution_FracAtD_AGP_1of4                                                                                                                                                                                                                                                                                                                                                                                                                                                                                                          | nuclei_AreaShape_Zernike_4_2                                                                                                         | nuclei_RadialDistribution_FracAtD_RNA_3of4                                                                       |
| cells_RadialDistribution_MeanFrac_ER_3of4                                                                                                                                                                                                                                                                                                                                                                                                                                                                                                          | nuclei_AreaShape_Zernike_7_1                                                                                                         | nuclei_RadialDistribution_MeanFrac_AGP_2of4                                                                      |
| cells_RadialDistribution_MeanFrac_RNA_4of4                                                                                                                                                                                                                                                                                                                                                                                                                                                                                                         | nuclei_Correlation_Correlation_DNA_RNA                                                                                               | nuclei_RadialDistribution_MeanFrac_Mito_3of4<br>nuclei_Correlation_Correlation_DNA_Mito                          |
|                                                                                                                                                                                                                                                                                                                                                                                                                                                                                                                                                    | nuclei_Correlation_Correlation_ER_AGP<br>nuclei_Correlation_Correlation_Mito_AGP                                                     | nuclei_RadialDistribution_MeanFrac_Mito_4of4                                                                     |
|                                                                                                                                                                                                                                                                                                                                                                                                                                                                                                                                                    | nuclei_Correlation_Manders_AGP_DNA<br>nuclei_Correlation_Manders_RNA_DNA                                                             | nuclei_RadialDistribution_RadialCV_AGP_3of4                                                                      |
|                                                                                                                                                                                                                                                                                                                                                                                                                                                                                                                                                    | nuclei_Correlation_Manders_Mito_ER<br>nuclei_Correlation_Manders_RNA_ER                                                              | nuclei_RadialDistribution_RadialCV_ER_1of4                                                                       |
|                                                                                                                                                                                                                                                                                                                                                                                                                                                                                                                                                    | nuclei_Correlation_Overlap_DNA_AGP                                                                                                   | nuclei_RadialDistribution_RadialCV_ER_3of4<br>nuclei_RadialDistribution_RadialCV_ER_2of4                         |
|                                                                                                                                                                                                                                                                                                                                                                                                                                                                                                                                                    |                                                                                                                                      | nuclei_RadialDistribution_RadialCV_RNA_4of4<br>cells_RadialDistribution_RadialCV_RNA_3of4                        |
|                                                                                                                                                                                                                                                                                                                                                                                                                                                                                                                                                    |                                                                                                                                      | nuclei_Texture_Correlation_AGP_10_01<br>nuclei_Texture_InfoMeas2_AGP_10_01<br>nuclei_Texture_InfoMeas2_AGP_10_03 |

**Supplementary Table 5 | Most common important CellProfiler features grouped based on correlation.** The top 100 most important CellProfiler features from Fig. 6a, clustered into 55 groups based on Pearson correlation.

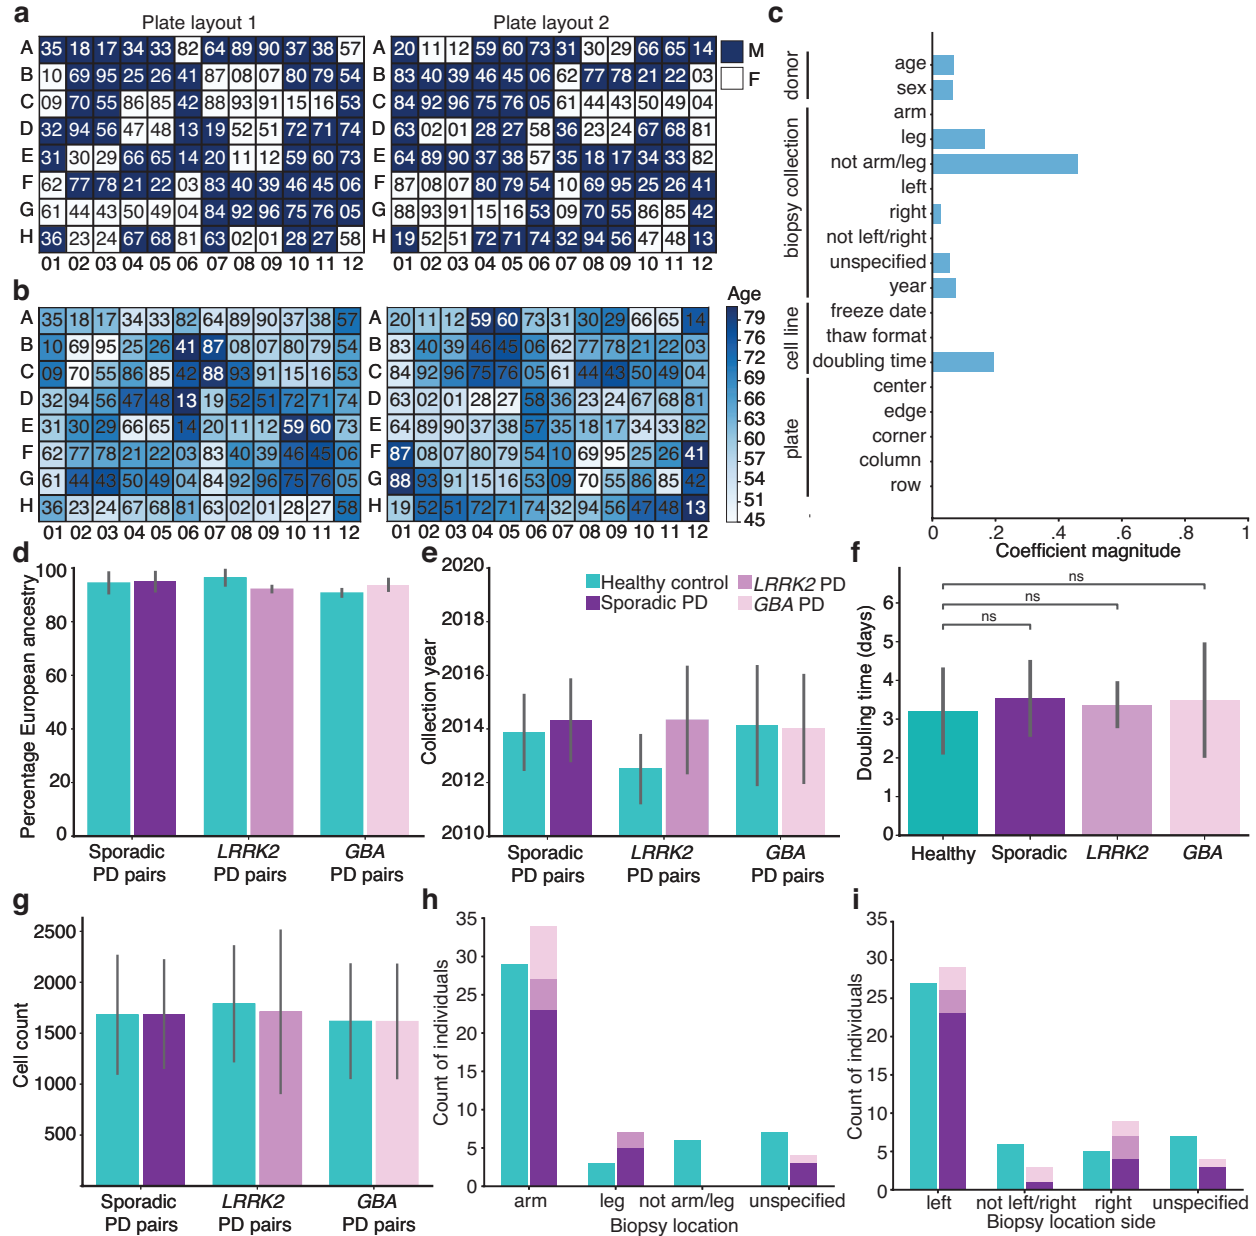

**Supplementary Fig. 1 | Experiment design details for high-content screening.** Various donor demographics including (a) sex (male (M), female (F)) and (b) age for the two 96-well plate layouts, where each well contains cells from the cell line denoted by the two-digit label. c, Lasso variable selection for healthy vs. PD on donor, biopsy, cell line, and plate covariates reveals no significant biases. Distributions of additional cell line covariates including (d) percentage European ancestry from genotyping analysis, (e) biopsy collection year, (f) cell doubling times (Mann–Whitney  $U = 57.0, p = 1.0 \times 10^{-2}$  for sporadic,  $U = 118.0, p = 6.4 \times 10^{-1}$  for *LRRK2 PD*, and  $U = 193.5, p = 1.00$  for *GBA PD* vs. healthy, respectively, ns:  $p > 5.0 \times 10^{-2}$ ), (g) well-level cell count, and biopsy location, (h) arm or leg and (i) left or right. Error bars denote standard deviation.

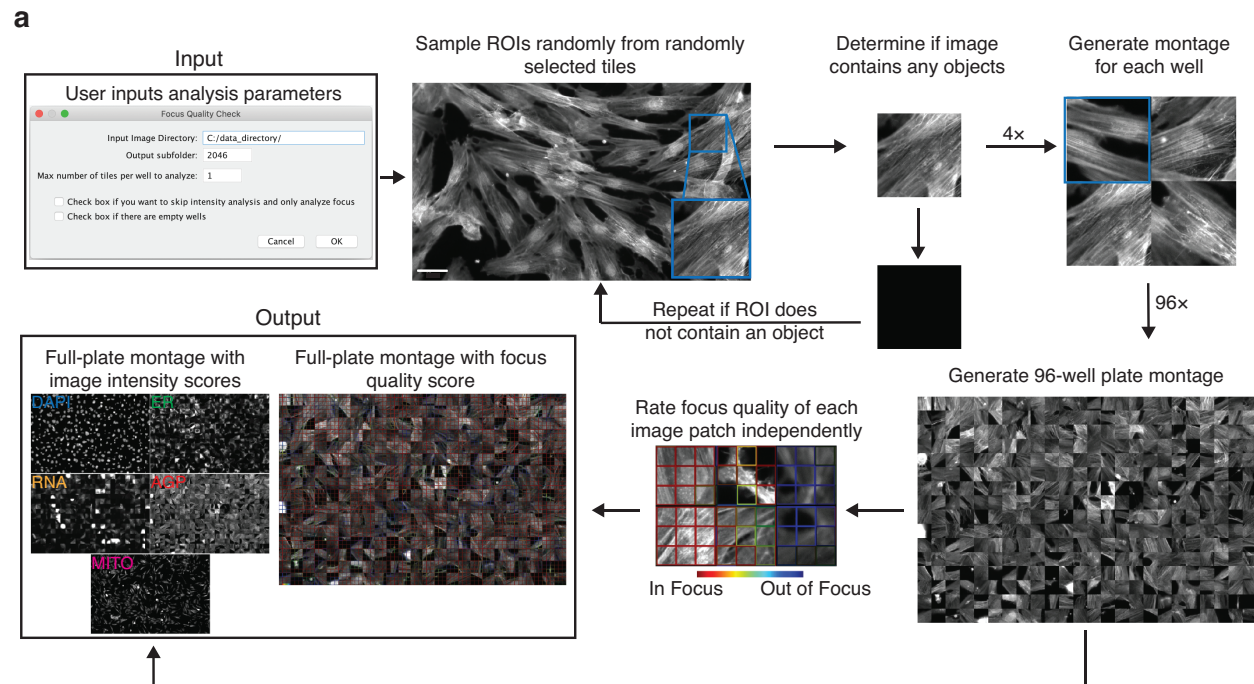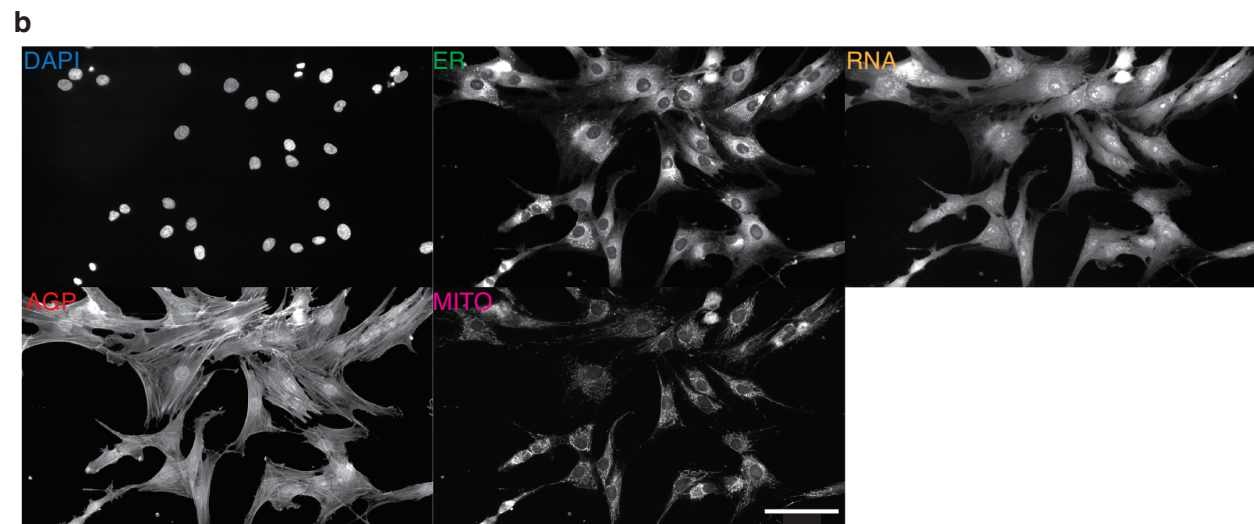

**Supplementary Fig. 2 | Overview of near real-time image quality analysis and sample Cell Painting images of primary human fibroblasts.** A Fiji (an ImageJ distribution) macro assesses the quality and consistency of the images sampled from a full 96-well plate. **a**, Four random regions of interest (ROI) are cropped from images in each channel and in each well, and 96-well montages are constructed for viewing. A measurement of mean image intensity across the plate is reported for each plate montage. Next, the montage corresponding to the user-designated focus channel is inputted to a microscope image focus classifier which calculates a focus quality score for each image patch. For visualization, a color-coded overlay on top of the montage highlights regions that are in focus (red) or out of focus (blue). Scale bar: 50  $\mu\text{m}$ . **b**, Sample images of one tile from the 5 Cell Painting channels. Scale bar: 100  $\mu\text{m}$ .



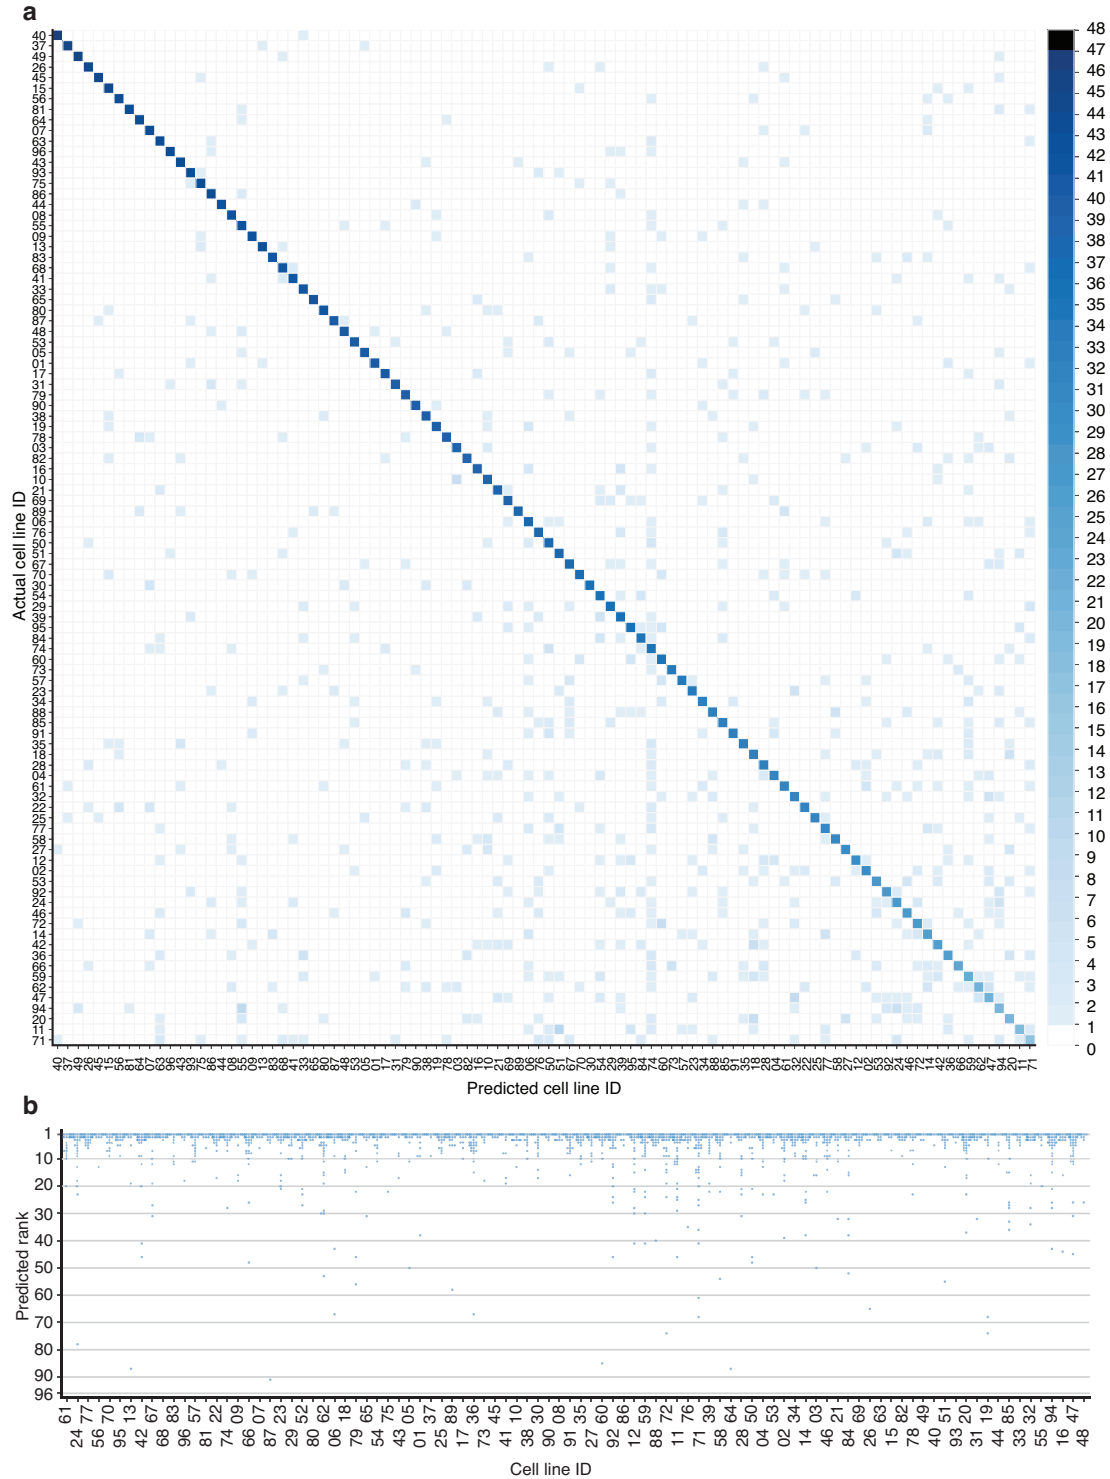

**Supplementary Fig. 3 | Identification of individual cell lines in held-out batches and plate layouts at the well-level. a**, Confusion matrix, sorted by the diagonal, showing the test set well-level predicted and actual cell lines for each of 6 wells in each of 8 held-out batch and held-out plate layouts for the model in **Fig. 3c**. **b**, Test set well-level predicted rank, among 96 of the 6 wells in each of 8 held-out batch and held-out plate layouts for the model in **Fig. 3c**.



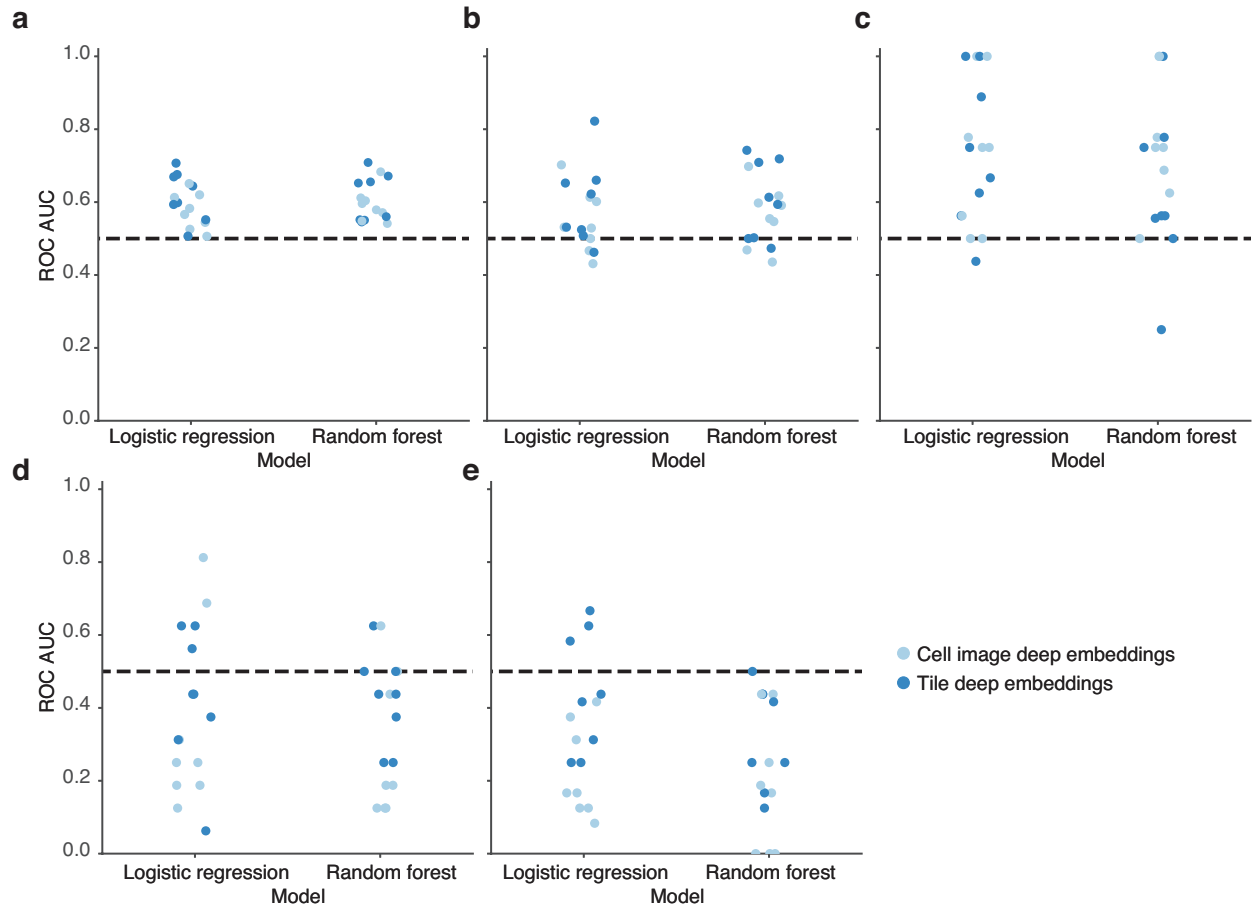

**Supplementary Fig. 4 | Preliminary evaluation of PD classification performance.** Test set cell line–level PD classification for (a) all PD ( $n = 45$  participants) and matched controls ( $n = 45$  participants), (b) sporadic PD ( $n = 31$ ) and matched controls ( $n = 31$  participants), (c) *LRRK2* PD ( $n = 6$  participants) and matched controls ( $n = 6$  participants), (d) *GBA* PD ( $n = 8$  participants) and matched controls ( $n = 8$  participants), and (e) *GBA* PD ( $n = 7$  participants) and matched controls ( $n = 8$  participants), excluding the unconfirmed *GBA* line (see Methods). In each case, for cross-validation, matched cell line pairs were randomly divided into a train half and a test half 8 times. Dashed line denotes chance performance.

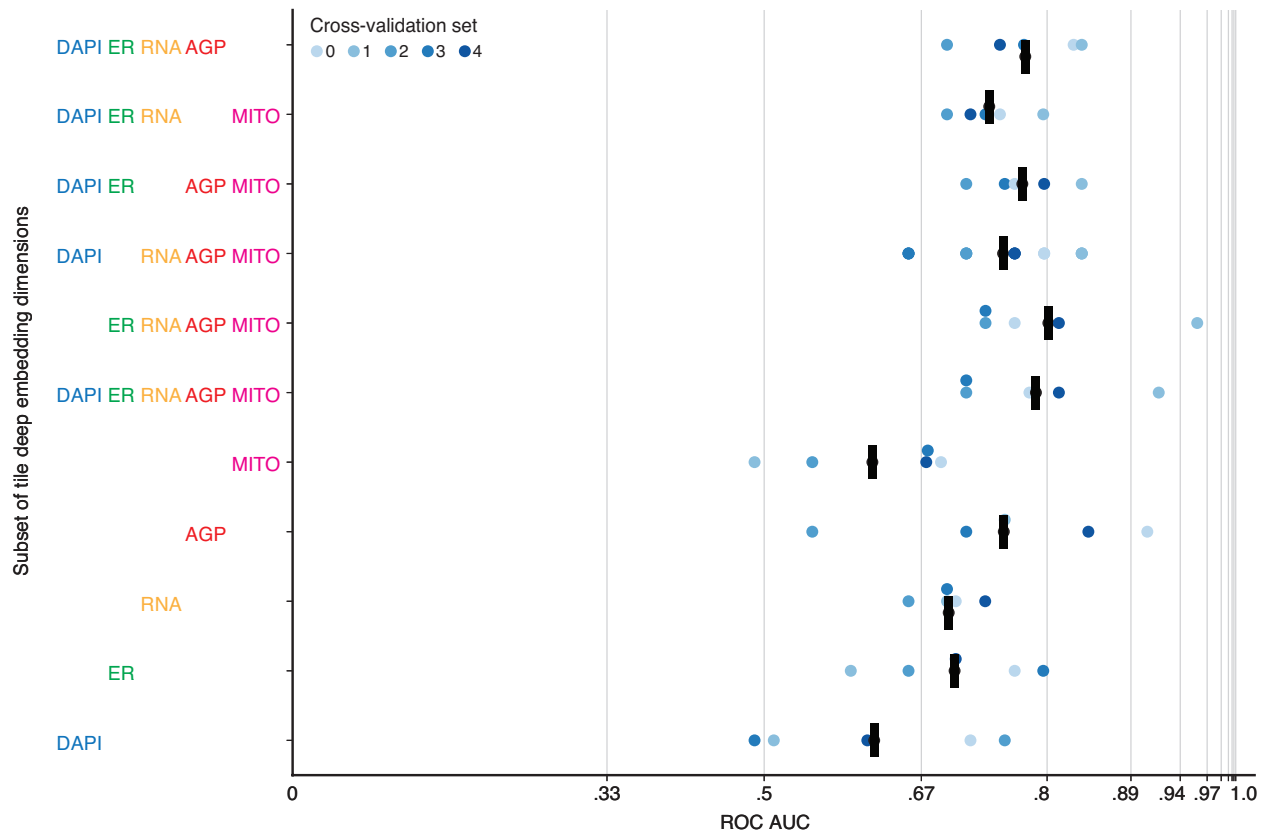

**Supplementary Fig. 5 | Impact of individual Cell Painting channels on PD classification.** The same logistic regression model with tile deep embeddings from **Fig. 5b** evaluated with a subset of the deep embedding dimensions corresponding to a subset of the 5 channels. Black bars denote the mean across all cross-validation sets. Grid line spacing denotes a doubling of the odds of correctly ranking a random healthy control and PD cell line. Dashed line denotes chance performance.

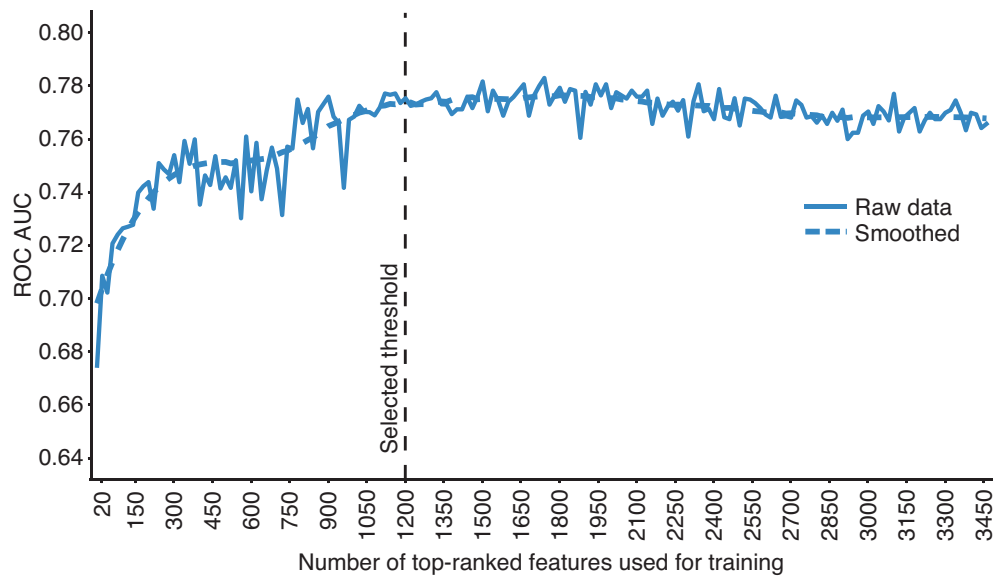

**Supplementary Fig. 6 | Estimating threshold for number of top-ranked CellProfiler features required for PD classification.** Performance of the random forest classifier as a function of number of top-ranked features used for training, evaluated in increments of 20 features. The dashed line represents the threshold selected for subsequent analyses.
